# Supplementary material
Source: publisher figshare collection journal article supplement (https://acs.figshare.com/ndownloader/files/4462624)
Supplement: Supplementary file 1 [file 4462624]

## Supporting Information

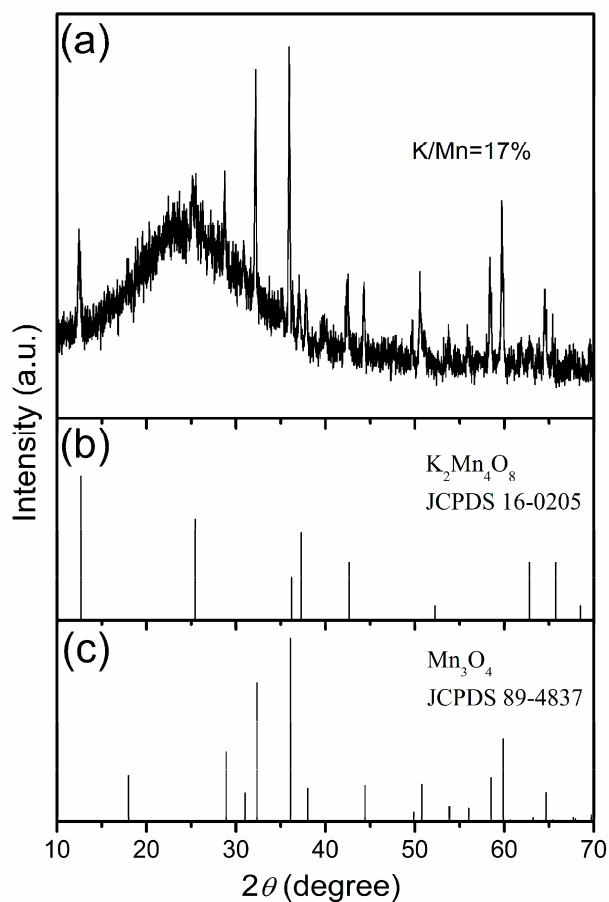

**Figure S1.** XRD pattern of the resultant product after the TGA and DTA measurements of the  $\alpha$ -K<sub>0.17</sub>MnO<sub>2</sub> sample. The XRD pattern is not very prominent due to the small amount of the sample, and the broad peak at lower angle is originated from the reflections of the glass sample holder.

**Table S1.** Magnetic transition temperature ( $T$ ), Curie-Weiss temperature ( $\theta$ ), and coercivity ( $H_C$ ) of  $\alpha$ -K<sub>x</sub>MnO<sub>2</sub> samples.

| $x$  | $T$ (K)           | $\theta$ (K) | $H_C$ (kOe) |
|------|-------------------|--------------|-------------|
| 0.10 | 39.2*             | -337         | 6.65        |
| 0.12 | 43.3*             | -272         | 8.65        |
| 0.15 | 25.4 <sup>†</sup> | -316         | 0.61        |
| 0.17 | 25.3 <sup>†</sup> | -348         | 0.55        |

\*freezing temperature

<sup>†</sup>Néel temperature
